# Supplementary material for: Differential Responses to Sigma-1 or Sigma-2 Receptor Ablation in Adiposity, Fat Oxidation, and Sexual Dimorphism
Source: MDPI journal article supplement (doi:10.3390/ijms231810846), 2022-09-16
Supplement: s1 [file s1]

## Supplemental Figures

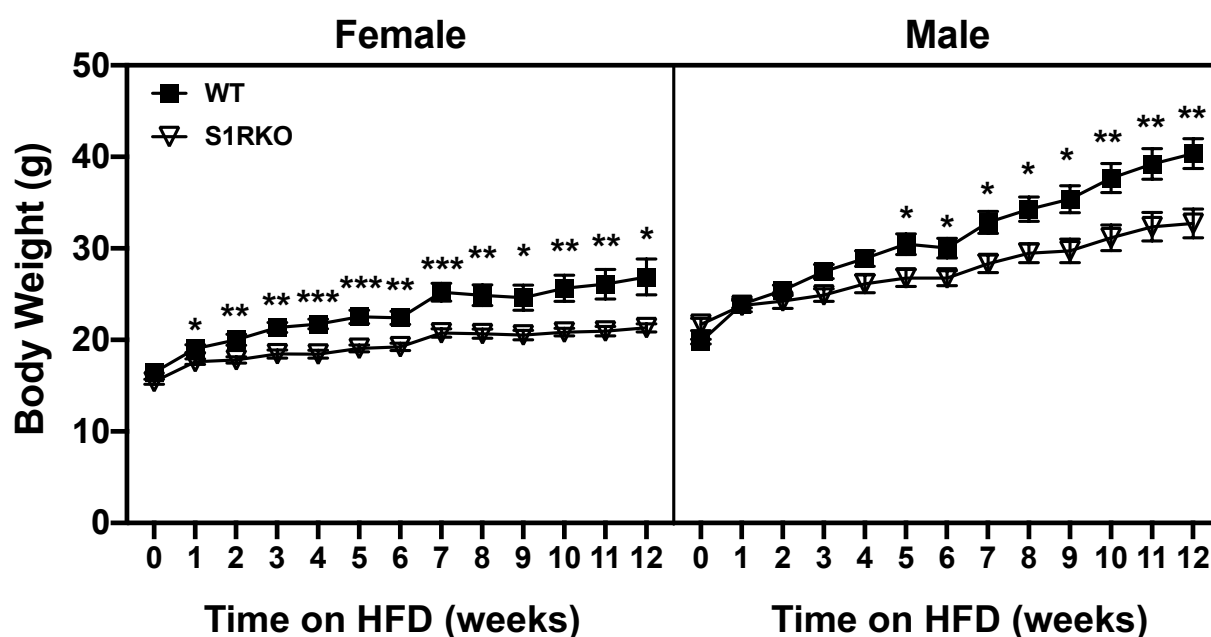

**Figure S1. Time course of body weight throughout the period of HFD feeding of S1R WT and KO mice**

Body weight was measured weekly until the end of 12 weeks of HFD. Statistical analysis: Unpaired two-tailed Student's *t* test for each time point (\**P* < 0.05, \*\**P* < 0.01, \*\*\**P* < 0.001), S1R KO vs WT, *n* = 7 or 8 mice. Data are presented as means ± SE. False discovery rates (FDRs) are presented in Table S1 and S2.

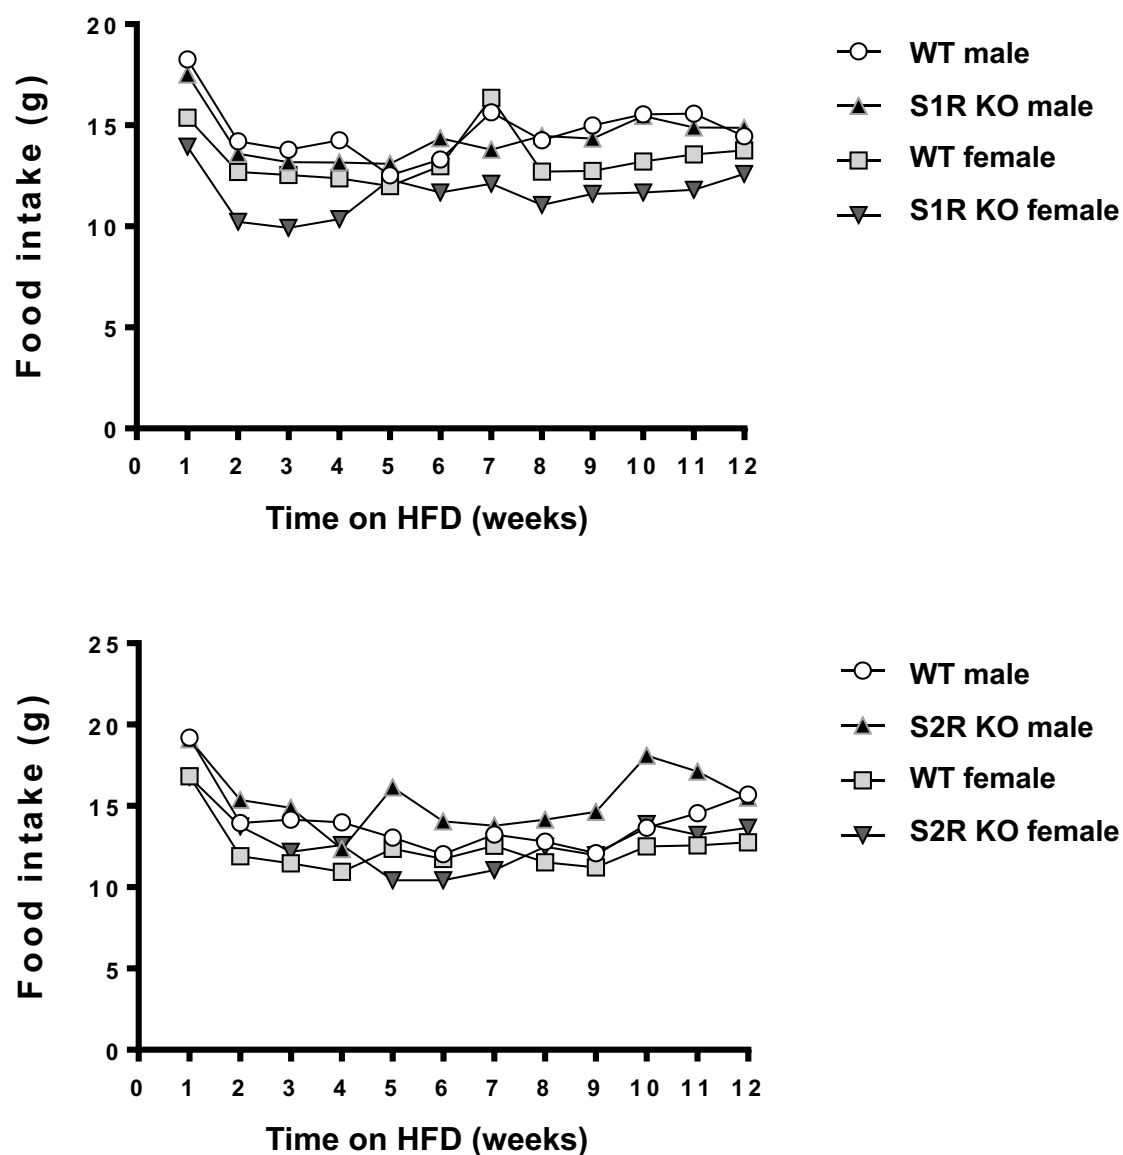

**Figure S2. Food intake during the period of HFD feeding**

Each data value represents averaged food intake per mouse, i.e. one week of food intake divided by animal number (4 or 5 mice in a cage). The time course indicates 12 weeks of HFD.

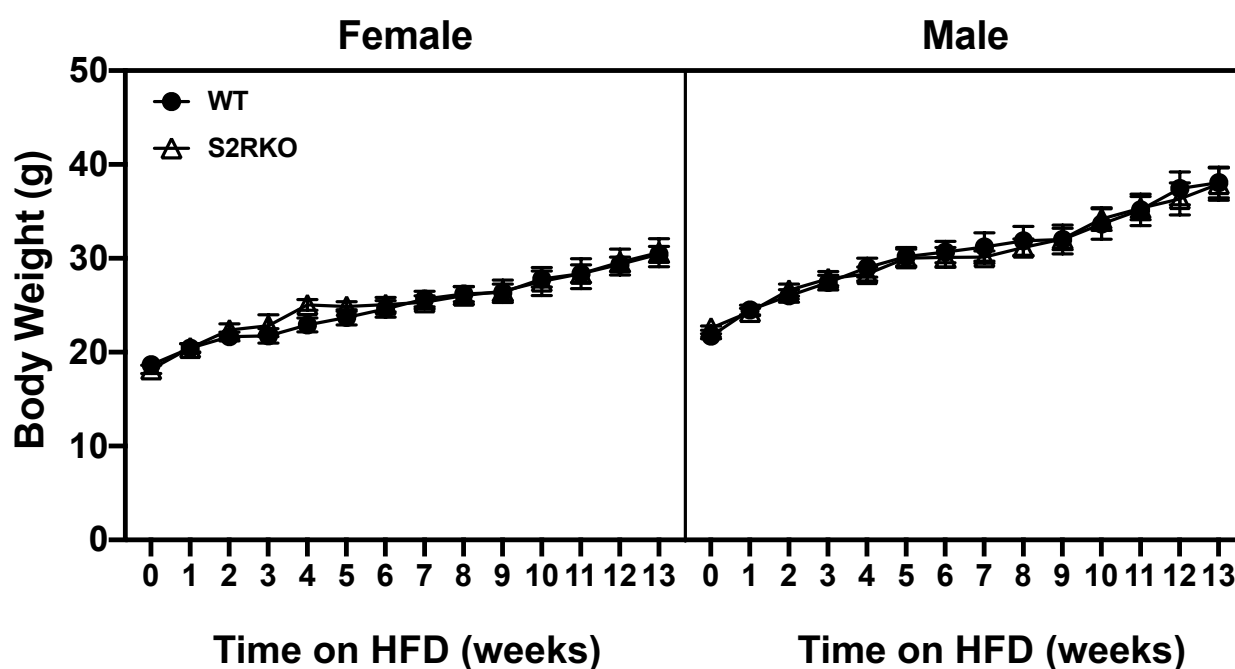

**Figure S3. Time course of body weight throughout the period of HFD feeding of S2R WT and KO mice**

Body weight was measured weekly until the end of 13 weeks of HFD. Statistical analysis: Unpaired two-tailed Student's *t* test for each time point, S2R KO vs WT, *n* = 10 or 11 mice. No difference was detected ( $P > 0.05$ ). Data are presented as means  $\pm$  SE. FDRs are presented in Table S3 and S4.

## Supplementary Tables

**Table S1. FDR caculated for female WT and S1R KO mice (see Figure S1 female).**

| WT-F vs<br>S1RKO-F | sorted p<br>value | q value     | BH critical value<br>(ranki/n)*0.05 | Dis-<br>cover? |
|--------------------|-------------------|-------------|-------------------------------------|----------------|
| week0              | 0.076095097       | 0.076095097 | 0.05                                | NO             |
| week1              | 0.018417511       | 0.019952303 | 0.046153846                         | YES            |
| week2              | 0.006728338       | 0.010933549 | 0.030769231                         | YES            |
| week3              | 0.001079284       | 0.003507672 | 0.015384615                         | YES            |
| week4              | 0.000230513       | 0.002996668 | 0.003846154                         | YES            |
| week5              | 0.00084544        | 0.005495359 | 0.007692308                         | YES            |
| week6              | 0.001724685       | 0.00448418  | 0.019230769                         | YES            |
| week7              | 0.000961821       | 0.00416789  | 0.011538462                         | YES            |
| week8              | 0.004401672       | 0.009536956 | 0.023076923                         | YES            |
| week9              | 0.014388824       | 0.018705472 | 0.038461538                         | YES            |
| week10             | 0.006100423       | 0.011329357 | 0.026923077                         | YES            |
| week11             | 0.009066376       | 0.013095876 | 0.034615385                         | YES            |
| week12             | 0.015167965       | 0.017925777 | 0.042307692                         | YES            |
|                    |                   |             |                                     |                |

**Table S2. FDR caculated for male WT and S1R KO mice (see Figure S1 male).**

| WT-M vs<br>S1RKO-M | p value    | q value    | BH critical value<br>(ranki/n)*0.05 | Dis-<br>cover ? |
|--------------------|------------|------------|-------------------------------------|-----------------|
| week0              | 0.01734927 | 0.03222008 | 0.02692308                          | Yes             |
| week1              | 0.88001584 | 0.88001584 | 0.05                                | NO              |
| week2              | 0.24078743 | 0.26085305 | 0.04615385                          | NO              |
| week3              | 0.02846692 | 0.04111889 | 0.03461538                          | Yes             |
| week4              | 0.05024536 | 0.05938088 | 0.04230769                          | NO              |
| week5              | 0.02795588 | 0.04542831 | 0.03076923                          | Yes             |
| week6              | 0.03399045 | 0.04418759 | 0.03846154                          | Yes             |
| week7              | 0.01283047 | 0.04169903 | 0.01538462                          | Yes             |
| week8              | 0.01512892 | 0.03277932 | 0.02307692                          | Yes             |
| week9              | 0.01370901 | 0.03564342 | 0.01923077                          | Yes             |
| week10             | 0.00966085 | 0.06279552 | 0.00769231                          | Yes             |
| week11             | 0.01091571 | 0.04730142 | 0.01153846                          | Yes             |
| week12             | 0.00518944 | 0.06746275 | 0.00384615                          | Yes             |

**Table S3. FDR caculated for female WT and S2R KO mice (see Figure S3 female).**

| <b>WT-F vs<br/>S2RKO-F</b> | <b>sorted p<br/>value</b> | <b>q value</b> | <b>BH critical value<br/>(ranki/n)*0.05</b> | <b>Dis-<br/>cover?</b> |
|----------------------------|---------------------------|----------------|---------------------------------------------|------------------------|
| week 0                     | 0.37544707                | 1.75208634     | 0.010714286                                 | NO                     |
| week 1                     | 0.94316191                | 1.10035557     | 0.042857143                                 | NO                     |
| week 2                     | 0.40833802                | 1.42918306     | 0.014285714                                 | NO                     |
| week 3                     | 0.45008804                | 1.26024652     | 0.017857143                                 | NO                     |
| week 4                     | 0.03619417                | 0.50671837     | 0.003571429                                 | NO                     |
| week 5                     | 0.23741862                | 1.66193031     | 0.007142857                                 | NO                     |
| week 6                     | 0.70408195                | 1.64285788     | 0.021428571                                 | NO                     |
| week 7                     | 0.75051461                | 1.50102921     | 0.025                                       | NO                     |
| week 8                     | 0.90469602                | 1.26657443     | 0.035714286                                 | NO                     |
| week 9                     | 0.9480797                 | 1.02100891     | 0.046428571                                 | NO                     |
| week 10                    | 0.8825426                 | 1.54444955     | 0.028571429                                 | NO                     |
| week 11                    | 0.99745229                | 0.99745229     | 0.05                                        | NO                     |
| week 12                    | 0.88502655                | 1.37670797     | 0.032142857                                 | NO                     |
| week 13                    | 0.9239                    | 1.17587273     | 0.039285714                                 | NO                     |

**Table S4. FDR caculated for male WT and S2R KO mice (see Figure S3 male).**

| <b>WT-M vs<br/>S2RKO-M</b> | <b>sorted p<br/>value</b> | <b>q value</b> | <b>BH critical value<br/>(ranki/n)*0.05</b> | <b>Dis-<br/>cover?</b> |
|----------------------------|---------------------------|----------------|---------------------------------------------|------------------------|
| week 0                     | 0.02620175                | 0.36682454     | 0.00357143                                  | NO                     |
| week 1                     | 0.75239154                | 1.17038683     | 0.03214286                                  | NO                     |
| week 2                     | 0.5128006                 | 3.58960417     | 0.00714286                                  | NO                     |
| week 3                     | 0.70196474                | 1.40392947     | 0.025                                       | NO                     |
| week 4                     | 0.60055042                | 2.10192647     | 0.01428571                                  | NO                     |
| week 5                     | 0.91527219                | 1.16489187     | 0.03928571                                  | NO                     |
| week 6                     | 0.71803228                | 1.2565565      | 0.02857143                                  | NO                     |
| week 7                     | 0.537697                  | 2.50925268     | 0.01071429                                  | NO                     |
| week 8                     | 0.70097354                | 1.63560494     | 0.02142857                                  | NO                     |
| week 9                     | 0.98063818                | 0.98063818     | 0.05                                        | NO                     |
| week 10                    | 0.80290611                | 1.12406856     | 0.03571429                                  | NO                     |
| week 11                    | 0.93072309                | 1.08584361     | 0.04285714                                  | NO                     |
| week 12                    | 0.65074127                | 1.82207555     | 0.01785714                                  | NO                     |
| week 13                    | 0.94837023                | 1.02132178     | 0.04642857                                  | NO                     |
|                            |                           |                |                                             |                        |

**Table S5. Primer sequences for qPCR.**

| Gene<br>symbol | Mouse (5' to 3')        |                         |
|----------------|-------------------------|-------------------------|
|                | Forward                 | Reverse                 |
| <i>Lpl</i>     | GATGCCCTACAAAGTGTTCCA   | AAATCTCGAAGGCCTGGTTG    |
| <i>Fatp4</i>   | GACTTCTCCAGCCGTTTCCACA  | CAAAGGACAGGATGCGGCTATTG |
| <i>Fabp5</i>   | GACGACTGTGTTCTCTTGTAACC | TGTTATCGTGCTCTCCTTCCCG  |
| <i>Cd36</i>    | TGGAGCTGTTATTGGTGCA     | TGGGTTTTGCACATCAAAGA    |
| <i>Cpt1</i>    | AAAGATCAATCGGACCCTAGACA | CAGCGAGTAGCGCATAGTCA    |
| <i>Lcad</i>    | TTTCCGGGAGAGTGTAAGGA    | ACTTCTCCAGCTTTCTCCCA    |
| <i>Mcad</i>    | GATGCATCACCTCGTGTAAC    | AAGCCCTTTTCCCCTGAA      |
| <i>Pdk4</i>    | GTCGAGCATCAAGAAAACCGTCC | GCGGTCAGTAATCCTCAGAGGA  |
| <i>Hsl</i>     | GCTCATCTCCTATGACCTACGG  | TCCGTGGATGTGAACAACCAGG  |
